# Supplementary material for: Splenic Nerve Neuromodulation Reduces Inflammation and Promotes Resolution in Chronically Implanted Pigs
Source: Frontiers journal article supplement (doi:10.3389/fimmu.2021.649786), 2021-03-29
Supplement: Table_1.xlsx [file Table_1.xlsx]

## Sheet: Hematology
			WBC	Neutrophils	Neutrophils	Lymphocytes	Lymphocytes	Monocytes	Monocytes	Eosinophils	Eosinophils	Basophils	Basophils	RBC	HGB	HCT	MCV	MCH	MCHC	RDW	PLT
	Time (days)	Individual Animal ID	10e9/l	10e9/l	%	10e9/l	%	10e9/l	%	10e9/l	%	10e9/l	%	10e12/l	g/dL	%	fL	pg	g/dL	%	10e9/l
	-2	SpNS #1	16.46	8.08	49.1	6.78	41.2	0.71	4.3	0.72	4.4	0.08	0.5	6.18	11.6	37.2	60.1	18.8	31.2	18.4	407
		SpNS #2	6.46	0.96	14.8	4.95	76.6	0.16	2.4	0.22	3.4	0.05	0.8	6.36	11.4	35.5	55.9	17.9	32	16.7	478
		SpNS #3	14.39	4.49	31.2	8.5	59.1	0.56	3.9	0.59	4.1	0.06	0.4	6.36	11.1	35.8	56.3	17.5	31.1	15.6	456
		SpNS #4	11.48	3.82	33.3	6.66	58	0.44	3.8	0.51	4.4	0.06	0.5	7.65	14.1	42.2	55.2	18.4	33.3	15.6	310
		SpNS #5	14.86	6.75	45.4	6.95	46.8	0.51	3.4	0.52	3.5	0.04	0.3	7.34	13.6	40.1	54.7	18.6	33.9	15.8	311
		SpNS #6	13.28	4.93	37.1	7.61	57.3	0.32	2.4	0.25	1.9	0.05	0.4	7.45	13.4	40.2	54	18	33.3	16.1	314
		MEAN	12.8217	4.83833	35.15	6.90833	56.5	0.45	3.36667	0.468333	3.61667	0.0566667	0.483333	6.89	12.5333	38.5	56.0333	18.2	32.4667	16.3667	379.333
		SEM	1.44144	1.00617	4.95518	0.480995	4.97273	0.0784007	0.327278	0.0799757	0.385933	0.00557773	0.0703167	0.268303	0.533958	1.11235	0.880025	0.198326	0.487625	0.440202	31.6877
		Sham #1	19.15	7.7	40.2	9.4	49.1	0.92	4.8	0.94	4.9	0.08	0.4	5.39	9.9	32	59.3	18.4	31	15.8	340
		Sham #2	12.49	4.87	39	6.43	51.5	0.41	3.3	0.62	5	0.06	0.5	7.84	14.8	43.9	55.9	18.9	33.7	15	305
		Sham #3	13.23	5.13	38.8	7.12	53.8	0.38	2.9	0.46	3.5	0.09	0.7	8.65	15.9	47.4	54.8	18.4	33.6	15.3	236
		Sham #4	11.79	3.78	32.1	7.09	60.1	0.4	3.4	0.4	3.4	0.05	0.4	7.2	13.5	40.6	56.4	18.7	33.1	15.4	379
		Sham #5	13.79	5.17	37.5	7.57	54.9	0.48	3.5	0.44	3.2	0.04	0.3	7.08	13	39.2	55.3	18.3	33.1	15.7	332
		Sham #6	16.82	5.87	34.9	9.47	56.3	0.56	3.3	0.77	4.6	0.08	0.5	5.91	11.1	35.8	60.5	18.7	30.9	14.1	405
		MEAN	14.545	5.42	37.0833	7.84667	54.2833	0.525	3.53333	0.605	4.1	0.0666667	0.466667	7.01167	13.0333	39.8167	57.0333	18.5667	32.5667	15.2167	332.833
		SEM	1.16181	0.533529	1.23974	0.523836	1.56129	0.0834965	0.266667	0.08755	0.334664	0.00802773	0.0557773	0.491728	0.914938	2.25395	0.945751	0.0954521	0.521323	0.252212	24.1818
	-1	SpNS #1	15.32	7.48	48.8	6.25	40.8	0.63	4.1	0.86	5.6	0.06	0.4	5.89	11.1	35.1	59.7	18.8	31.5	18	397
		SpNS #2	6.92	0.53	7.6	5.48	79.2	0.35	5	0.23	3.3	0.06	0.9	6.22	11.1	35.2	56.6	17.9	31.6	16.5	487
		SpNS #3	11.68	3.61	30.9	7.08	60.6	0.43	3.7	0.42	3.6	0.04	0.3	6.2	11	35.1	56.6	17.7	31.2	15.6	445
		SpNS #4	12.19	4.61	37.8	6.34	52	0.46	3.8	0.63	5.2	0.05	0.4	7.63	13.9	42.2	55.3	18.3	33	15.6	287
		SpNS #5	15.09	6.88	45.6	7.14	47.3	0.47	3.1	0.48	3.2	0.03	0.2	7.26	13.2	39.9	54.9	18.2	33.1	15.9	278
		SpNS #6	13.39	5.26	39.3	7.24	54.1	0.42	3.1	0.27	2	0.08	0.6	6.89	12.3	37.2	54	17.9	33.1	16.1	306
		MEAN	12.4317	4.72833	35	6.58833	55.6667	0.46	3.8	0.481667	3.81667	0.0533333	0.466667	6.68167	12.1	37.45	56.1833	18.1333	32.25	16.2833	366.667
		SEM	1.25605	1.02265	6.04621	0.281382	5.43162	0.0381226	0.289828	0.0961047	0.550404	0.0071492	0.102198	0.279826	0.506623	1.22113	0.814623	0.160555	0.369459	0.37006	36.2516
		Sham #1	17.43	7.37	42.3	8.47	48.6	0.71	4.1	0.75	4.3	0.05	0.3	5.47	9.5	32.4	59.2	17.3	29.2	15.7	346
		Sham #2	11.76	4.86	41.3	5.83	49.6	0.47	4	0.47	4	0.05	0.4	7.64	14.3	42.5	55.6	18.7	33.7	15.2	308
		Sham #3	14.33	6.03	42.1	6.99	48.8	0.52	3.6	0.66	4.6	0.04	0.3	8.27	15	45.5	55	18.1	32.9	15.2	243
		Sham #4	12.81	4.24	33.1	7.39	57.7	0.63	4.9	0.37	2.9	0.06	0.5	6.86	12.9	38.8	56.6	18.9	33.4	15.4	366
		Sham #5	15.12	5.82	38.5	8.15	53.9	0.53	3.5	0.41	2.7	0.05	0.3	7.15	13	39.3	55	18.2	33.1	15.6	325
		Sham #6	17.62	6.63	37.6	9.6	54.5	0.58	3.3	0.7	4	0.07	0.4	6.24	11.1	37.7	60.4	17.8	29.5	14.3	389
		MEAN	14.845	5.825	39.15	7.73833	52.1833	0.573333	3.9	0.56	3.75	0.0533333	0.366667	6.93833	12.6333	39.3667	56.9667	18.1667	31.9667	15.2333	329.5
		SEM	0.972662	0.46621	1.44539	0.532093	1.52434	0.0352767	0.23523	0.0664329	0.314907	0.00421637	0.0333333	0.406624	0.831732	1.81726	0.940095	0.238979	0.83573	0.204396	20.9041
	0	SpNS #1	10.38	3.58	34.5	5.72	55.1	0.37	3.6	0.58	5.6	0.07	0.7	5.97	12	36.2	60.6	20.1	33.1	17.5	402
		SpNS #2	12.24	3.06	25	8.21	67.1	0.55	4.5	0.31	2.5	0.06	0.5	6.22	10.9	34.6	55.7	17.6	31.6	16.1	494
		SpNS #3	14.47	4.93	34.1	8.29	57.3	0.52	3.6	0.58	4	0.1	0.7	6.55	11.5	37.3	57	17.5	30.7	15.6	437
		SpNS #4	12.25	4.9	40	6.15	50.2	0.5	4.1	0.59	4.8	0.04	0.3	7.63	13.8	42.2	55.3	18.1	32.7	16	275
		SpNS #5	15.67	7.11	45.4	7.18	45.8	0.71	4.5	0.5	3.2	0.03	0.2	7.34	13.3	40.1	54.7	18.1	33.1	15.7	298
		SpNS #6	14.17	5.64	39.8	7.52	53.1	0.5	3.5	0.34	2.4	0.06	0.4	7.16	12.9	38.6	53.9	18.1	33.5	16.2	320
		MEAN	13.1967	4.87	36.4667	7.17833	54.7667	0.525	3.96667	0.483333	3.75	0.06	0.466667	6.81167	12.4	38.1667	56.2	18.25	32.45	16.1833	371
		SEM	0.783818	0.593161	2.85396	0.432091	2.95902	0.0447772	0.18915	0.0519401	0.525198	0.01	0.0843274	0.270622	0.45607	1.11853	0.976388	0.386221	0.439507	0.279782	35.3987
		Sham #1	18.75	8.46	45.1	8.74	46.6	0.79	4.2	0.62	3.3	0.09	0.5	5.46	10	33.1	60.6	18.4	30.3	15.5	340
		Sham #2	12.47	5.03	40.3	6.33	50.8	0.44	3.5	0.51	4.1	0.05	0.4	7.55	14.3	41.9	55.5	18.9	34.1	15.1	321
		Sham #3	15.04	6.48	43.1	7.32	48.7	0.42	2.8	0.6	4	0.06	0.4	8.55	15.4	46.9	54.9	18	32.8	15.4	271
		Sham #4	12.22	4.35	35.6	6.81	55.7	0.57	4.7	0.34	2.8	0.02	0.2	6.92	13	38.9	56.3	18.8	33.4	15.5	359
		Sham #5	14.86	5.62	37.8	8.07	54.3	0.55	3.7	0.4	2.7	0.04	0.3	7.26	13.3	39.9	54.9	18.4	33.5	15.8	348
		Sham #6	15.13	4.6	30.4	9.27	61.3	0.45	3	0.67	4.4	0.09	0.6	6.34	11.8	39	61.4	18.7	30.4	14.1	401
		MEAN	14.745	5.75667	38.7167	7.75667	52.9	0.536667	3.65	0.523333	3.55	0.0583333	0.4	7.01333	12.9667	39.95	57.2667	18.5333	32.4167	15.2333	340
		SEM	0.963323	0.624354	2.17706	0.46467	2.17639	0.0565489	0.292973	0.0534582	0.292973	0.0113774	0.057735	0.431476	0.774023	1.83517	1.20351	0.13581	0.67499	0.244495	17.5765
	2	SpNS #1	11.22	2.15	19.2	7.48	66.7	0.66	5.9	0.67	6	0.1	0.9	6.06	11.2	36.9	60.8	18.4	30.3	17.6	406
		SpNS #2	14.08	6.2	44	6.89	48.9	0.42	3	0.42	3	0.06	0.4	5.98	10.7	33.6	56.1	17.9	31.9	16.1	446
		SpNS #3	12.97	3.88	29.9	7.87	60.7	0.47	3.6	0.61	4.7	0.09	0.7	6.35	11.3	36.1	56.9	17.8	31.2	15.7	417
		SpNS #4	10.84	4.12	38	5.68	52.4	0.46	4.2	0.46	4.2	0.04	0.4	7.04	12.9	38.9	55.3	18.3	33	16.3	305
		SpNS #5	19.54	12.27	62.8	6.21	31.8	0.63	3.2	0.29	1.5	0.02	0.1	6.39	12.1	35	54.8	18.9	34.4	15.8	318
		SpNS #6	13.4	5.09	38	7.41	55.3	0.5	3.7	0.23	1.7	0.07	0.5	7.23	12.9	39.4	54.5	17.9	32.8	16.5	315
		MEAN	13.675	5.61833	38.65	6.92333	52.6333	0.523333	3.93333	0.446667	3.51667	0.0633333	0.5	6.50833	11.85	36.65	56.4	18.2	32.2667	16.3333	367.833
		SEM	1.28061	1.43942	5.96533	0.341503	4.89242	0.0400555	0.428693	0.0704588	0.722688	0.0122927	0.112546	0.209975	0.379254	0.913145	0.950088	0.17127	0.591983	0.281267	25.3027
		Sham #1	17.36	6.65	38.3	9.06	52.2	0.75	4.3	0.75	4.3	0.07	0.4	5.23	9.9	31.8	60.8	18.9	31.1	15.7	330
		Sham #2	11.5	4.36	37.9	5.91	51.4	0.38	3.3	0.71	6.2	0.06	0.5	7.08	13.3	39.2	55.4	18.8	33.9	15.1	306
		Sham #3	13.81	4.99	36.1	7.5	54.3	0.5	3.6	0.72	5.2	0.08	0.6	7.69	14.1	42.3	55	18.4	33.5	15.3	289
		Sham #4	11.32	3.72	32.9	6.58	58.1	0.51	4.5	0.35	3.1	0.05	0.4	6.97	13	39.3	56.4	18.6	33	15.4	371
		Sham #5	14.19	5.08	35.8	7.9	55.7	0.55	3.9	0.45	3.2	0.04	0.3	6.92	12.6	38.4	55.5	18.3	32.9	15.8	334
		Sham #6	15.47	5.26	34	9.1	58.8	0.4	2.6	0.62	4	0.05	0.3	6.36	12	39.3	61.7	18.8	30.5	14.1	373
		MEAN	13.9417	5.01	35.8333	7.675	55.0833	0.515	3.7	0.6	4.33333	0.0583333	0.416667	6.70833	12.4833	38.3833	57.4667	18.6333	32.4833	15.2333	333.833
		SEM	0.947535	0.401829	0.86397	0.527395	1.23543	0.0542064	0.284019	0.0669328	0.488308	0.00600925	0.0477261	0.342631	0.590715	1.42628	1.21646	0.0988826	0.557624	0.249889	13.802
	7	SpNS #1	15.5	6.23	40.2	7.44	48	0.87	5.6	0.82	5.3	0.05	0.3	6.01	11.1	35.6	59.3	18.5	31.2	16.5	407
		SpNS #2	13.31	5.58	41.9	6.6	49.6	0.53	4	0.43	3.2	0.09	0.7	5.99	10.6	33.6	56.1	17.6	31.4	16.6	369
		SpNS #3	15.16	6.22	41	7.66	50.5	0.58	3.8	0.53	3.5	0.08	0.5	6.14	10.8	35.2	57.4	17.7	30.8	16.1	373
		SpNS #4	10.94	5.26	48.1	4.64	42.4	0.54	4.9	0.44	4	0.03	0.3	6.74	12.4	37.8	56	18.4	32.9	16.6	293
		SpNS #5	15.13	6.17	40.8	7.9	52.2	0.5	3.3	0.42	2.8	0.05	0.3	7.02	12.8	38.7	55.2	18.2	33	16.4	357
		SpNS #6	14.78	6.49	43.9	7.43	50.3	0.47	3.2	0.24	1.6	0.03	0.2	7.03	12.7	38.1	54.2	18.1	33.4	16.8	308
		MEAN	14.1367	5.99167	42.65	6.945	48.8333	0.581667	4.13333	0.48	3.4	0.055	0.383333	6.48833	11.7333	36.5	56.3667	18.0833	32.1167	16.5	351.167
		SEM	0.712005	0.190952	1.21072	0.494488	1.40159	0.0596331	0.384419	0.0781878	0.503984	0.010247	0.0749074	0.203132	0.411231	0.816497	0.728774	0.149257	0.451971	0.0966092	17.5051
		Sham #1	19.35	6.35	32.8	10.57	54.6	0.97	5	1.39	7.2	0.06	0.3	5.83	10.8	35	60	18.6	30.9	15.7	328
		Sham #2	12.07	4.78	39.6	6	49.7	0.42	3.5	0.72	6	0.05	0.4	6.8	12.9	38.3	56.4	18.9	33.6	15.7	321
		Sham #3	13.32	4.98	37.4	7.06	53	0.41	3.1	0.68	5.1	0.08	0.6	8.5	15.6	47.4	55.8	18.4	33	16.2	276
		Sham #4	12.02	3.95	32.9	7.1	59.1	0.49	4.1	0.35	2.9	0.04	0.3	6.97	12.9	39	55.9	18.6	33.2	15.6	374
		Sham #5	13.35	5.07	38	7.24	54.2	0.55	4.1	0.35	2.6	0.03	0.2	6.58	12.1	36.3	55.2	18.4	33.3	16.4	371
		Sham #6	15.96	5.08	31.8	9.61	60.2	0.53	3.3	0.59	3.7	0.06	0.4	6.26	11.8	38.4	61.3	18.9	30.9	14.1	352
		MEAN	14.345	5.035	35.4167	7.93	55.1333	0.561667	3.85	0.68	4.58333	0.0533333	0.366667	6.82333	12.6833	39.0667	57.4333	18.6333	32.4833	15.6167	337
		SEM	1.15874	0.315053	1.34621	0.717375	1.59826	0.0848692	0.284898	0.156162	0.745393	0.0071492	0.0557773	0.374011	0.66504	1.77645	1.04265	0.0918937	0.506897	0.330067	15.0643

## Sheet: Biochemistry
	Time (days)	Individual Animal ID	Total protein (g/l)	Albumin (g/l)	Globulin (g/l)	Sodium (mmol/l)	Potassium (mmol/l)	Chloride (mmol/l)	Calcium (mmol/l)	Inorganic Phosphorus (mmol/l)	Urea (mmol/l)	Creatinine (umol/l)	Cholesterol (mmol/l)	Total Bilirubin (umol/l)	Amylase (U/l)	Lipase (U/l)	ALT (U/l)	CK (U/l)	ALP (U/l)	Lipase DGR (U/l)	SDH (U/l)	GGT (U/l)	Triglycerides (mmol/l)
	-2	SpNS #1	73.3	39.3	34	143.3	5.86	99.4	2.54	2.4	5.1	68	2.08	4.1	1694.5	14	74.5	2557	86	28.7	13.5	47.4	0.18
		SpNS #2	66.9	34.9	32	140.6	4.66	98.9	2.46	2.24	3.8	90	1.88	3.2	661.6	9	57.7	1099	76	22.8	10.8	27.7	0.34
		SpNS #3	64.3	34.4	29.9	141.1	4.9	99.2	2.5	2.31	4.9	93	2.12	3.3	444.2	12	50.6	1164	86	22.6	14.1	44.3	0.16
		SpNS #4	69.4	41.6	27.8	140.4	5.42	100	2.47	2.39	4.4	113	3.26	3	4173.4	16	88.7	2197	106	16.1	15.4	54.1	0.23
		SpNS #5	65.2	38.5	26.7	142.5	5.22	101.7	2.53	2	4.3	97	2.77	3.4	1037.9	32	60.9	841	106	15.6	14.3	54.5	0.28
		SpNS #6	61	38.9	22.1	145	3.9	100.4	2.62	2.21	5	118	2.85	1.8	2652.7	23	70.2	1030	89	12.7	8.6	41.5	0.36
		MEAN	66.6833	37.9333	28.75	142.15	4.99333	99.9333	2.52	2.25833	4.58333	96.5	2.49333	3.13333	1777.38	17.6667	67.1	1481.33	91.5	19.75	12.7833	44.9167	0.258333
		SEM	1.74536	1.12921	1.72022	0.733371	0.276871	0.417665	0.0238048	0.0604106	0.205616	7.30639	0.221956	0.307318	579.745	3.45125	5.5677	290.393	4.92443	2.4343	1.04608	4.04478	0.0337062
		Sham #1	-	-	-	-	-	-	-	-	-	-	-	-	-	-	-	-	-	-	-	-	-
		Sham #2	67	41.2	25.8	139.6	5.33	98.5	2.52	2.24	3.8	124	2.97	3.3	912	22	79.7	2727	85	15.5	15.4	50.8	0.34
		Sham #3	63.4	43.3	20.1	143	5.05	100.2	2.5	2.3	4.1	118	2.82	2.9	804.8	26	64.5	977	135	16.5	15.1	32.8	0.38
		Sham #4	63	38.7	24.3	144.3	4.15	103	2.57	2	4.6	112	2.67	1.6	862.8	27	69.1	1189	78	13.9	7.7	64.6	0.3
		Sham #5	65.1	39.4	25.7	143.2	3.97	99.5	2.64	1.88	4.4	107	2.88	2.1	3945.8	19	57.6	1517	90	13.4	6.9	71.1	0.63
		Sham #6	65.1	37.2	27.9	141.4	5.51	99.2	2.52	2.33	4.6	80	2.29	3.5	2851.7	33	59.2	2491	93	22.1	12.7	61.6	0.18
		MEAN	64.72	39.96	24.76	142.3	4.802	100.08	2.55	2.15	4.3	108.2	2.726	2.68	1875.42	25.4	66.02	1780.2	96.2	16.28	11.56	56.18	0.366
		SEM	0.713723	1.05385	1.29908	0.818535	0.31296	0.779359	0.0252982	0.0889944	0.154919	7.60526	0.11944	0.361109	645.732	2.37908	3.97711	351.112	10.027	1.55705	1.80544	6.70242	0.074
	-1	SpNS #1	72.7	37.6	35.1	146.3	4.97	101.1	2.54	2.35	4.7	62	1.92	2.7	1702.2	33	71.9	1407	77	24	10.1	28.9	0.16
		SpNS #2	67.8	35.1	32.7	142.6	5.13	99.4	2.41	2.49	3.6	93	1.89	2.9	639.5	24	56.5	1059	77	22.1	12.8	37.7	0.26
		SpNS #3	66	34.7	31.3	142.1	5.22	100.7	2.46	2.46	4.6	96	2.13	3.4	431.3	26	52.8	1191	83	19.7	14.9	50.7	0.15
		SpNS #4	68.3	40.5	27.8	143	5.31	101	2.55	2.48	4.2	108	2.96	2.5	4214.5	39	84.4	2107	106	15.3	11.1	43.9	0.21
		SpNS #5	66.7	37.1	29.6	145.2	4.26	99.2	2.62	1.96	3.9	91	2.25	1.3	961.8	29	56	737	94	11.9	13.4	57.5	0.21
		SpNS #6	64.7	37.4	27.3	146.9	3.98	100.7	2.61	2.41	4.3	123	2.55	1.7	2538.7	35	68.1	990	105	11.7	10.1	25.6	0.23
		MEAN	67.7	37.0667	30.6333	144.35	4.81167	100.35	2.53167	2.35833	4.21667	95.5	2.28333	2.41667	1748	31	64.95	1248.5	90.3333	17.45	12.0667	40.7167	0.203333
		SEM	1.12931	0.849575	1.22302	0.836162	0.226383	0.339362	0.033805	0.0824385	0.170131	8.28955	0.167365	0.318765	585.705	2.32379	4.95195	194.063	5.42627	2.14534	0.796102	5.06204	0.017062
		Sham #1	65.2	32	33.2	144.6	4.33	97.5	2.49	1.97	4.3	80	2.2	2.3	680.6	24	59.8	992	96	15.6	10.6	22.7	0.37
		Sham #2	65.4	40	25.4	143.9	4.85	99.1	2.49	2.4	3.9	124	2.61	2.3	919.1	31	75.8	2961	82	13.7	12	43.2	0.23
		Sham #3	64.8	41	23.8	146.9	4.17	101.7	2.63	2.3	4	115	2.38	1.7	768.7	33	57.8	723	126	9.6	13.6	25.5	0.29
		Sham #4	66.7	37.8	28.9	143.6	4.23	102.8	2.64	1.95	4	119	2.43	1.7	1013.2	31	70.6	1080	90	20.7	8	35	0.28
		Sham #5	70.6	38.9	31.7	142.9	4.28	99.8	2.69	1.92	4	116	2.65	2.1	3879.3	22	60.7	1188	102	11	7	37	0.36
		Sham #6	68.1	38	30.1	143.4	5.08	101.4	2.54	2.29	4.9	82	2.23	2.2	3085.6	34	57.3	1476	93	17.8	10.4	41.6	0.24
		MEAN	66.8	37.95	28.85	144.217	4.49	100.383	2.58	2.13833	4.18333	106	2.41667	2.05	1724.42	29.1667	63.6667	1403.33	98.1667	14.7333	10.2667	34.1667	0.295
		SEM	0.906642	1.28886	1.48341	0.583904	0.154639	0.7939	0.034641	0.0873848	0.153659	8.01249	0.0764054	0.114746	567.264	2.02347	3.13046	327.341	6.18825	1.70405	1.00089	3.42624	0.0240486
	0	SpNS #1	72.5	37.5	35	143.1	5.18	100.7	2.59	2.04	4.8	75	1.76	2.9	1724.7	24	73.9	974	76	23.8	10.5	33.6	0.27
		SpNS #2	69	33.6	35.4	141.3	4.73	98.6	2.5	2.26	3.9	89	2.02	2.9	649.3	30	59.7	1246	78	15.1	10.4	28.4	0.22
		SpNS #3	68	34.8	33.2	142.2	4.88	99.9	2.65	1.99	4.7	93	2.08	2.8	460.9	28	58.3	1094	90	13.2	14.6	45.4	0.18
		SpNS #4	69.9	39.7	30.2	144.1	4.41	99.1	2.6	2.35	4.5	96	2.84	1.9	4112.3	49	78.5	1463	108	10.3	13.8	35.9	0.24
		SpNS #5	66.7	37.4	29.3	143.1	4.32	99.1	2.64	2.02	4.3	80	2.43	1.9	923.2	32	54.8	677	104	10.8	15	56	0.2
		SpNS #6	66.8	38.4	28.4	145.5	4.11	101.5	2.64	2.25	4.5	112	2.79	1.8	2600.4	33	69.9	955	102	11.2	9.2	25	0.22
		MEAN	68.8167	36.9	31.9167	143.217	4.605	99.8167	2.60333	2.15167	4.45	90.8333	2.32	2.36667	1745.13	32.6667	65.85	1068.17	93	14.0667	12.25	37.3833	0.221667
		SEM	0.89421	0.930949	1.23083	0.598006	0.16188	0.451971	0.0229008	0.0623654	0.131022	5.32552	0.179314	0.224598	573.325	3.51821	3.90792	109.98	5.62731	2.07873	1.02103	4.69542	0.0127584
		Sham #1	66.9	34.1	32.8	142.5	5.29	98.6	2.51	2.04	4	90	2.44	4.4	675.1	19	65	1115	106	23.8	14.3	36.7	0.3
		Sham #2	67	39	28	143.7	4.14	97.1	2.58	2.22	3.9	108	2.55	2.1	924.9	27	68.2	2436	82	10.2	12.6	36.9	0.34
		Sham #3	65.2	41.2	24	146.7	4.15	100.3	2.6	2.2	4.2	104	2.63	2.2	893.3	36	59.2	669	133	12.1	15.8	25.6	0.31
		Sham #4	67.8	38.2	29.6	143.7	4.18	102.4	2.61	1.93	4.5	116	2.51	1.8	1079.9	38	71.1	728	89	22.8	8.7	35.6	0.25
		Sham #5	73	40	33	144.3	4.11	101.1	2.72	1.87	4.1	115	2.73	2.1	3972.5	19	63.6	698	98	11.4	6.7	38.2	0.36
		Sham #6	67.8	37.4	30.4	142.4	5.08	98	2.53	2.42	3.9	88	2.34	3.3	3024.9	28	58.5	1473	91	20.8	13.4	56.9	0.29
		MEAN	67.95	38.3167	29.6333	143.883	4.49167	99.5833	2.59167	2.11333	4.1	103.5	2.53333	2.65	1761.77	27.8333	64.2667	1186.5	99.8333	16.85	11.9167	38.3167	0.308333
		SEM	1.0819	1.00413	1.37056	0.640009	0.22111	0.824385	0.0302673	0.0838915	0.0930949	4.93795	0.0562534	0.40886	565.191	3.30067	2.0172	280.779	7.42705	2.5547	1.42581	4.1596	0.0157938
	2	SpNS #1	75.5	36.7	38.8	146	3.81	100.8	2.65	1.81	4.7	76	1.53	1.8	1693.8	22	71.8	695	74	16.1	6.7	37.2	0.36
		SpNS #2	69.7	35.2	34.5	140.1	4.99	98.5	2.52	2.29	4	93	2.07	3.1	747.5	26	68.9	1566	93	17.9	13.4	48.9	0.32
		SpNS #3	65.9	34.2	31.7	141.5	5.03	99.7	2.59	2.43	5.1	93	2.18	3.3	521.8	27	58.6	1155	93	15.8	16.3	62.9	0.16
		SpNS #4	67.4	38.8	28.6	145	4.16	99.8	2.6	2.27	4.8	106	2.95	2.1	3880.9	44	75.3	3268	90	13	8.8	39.2	0.27
		SpNS #5	66.3	37.1	29.2	144.1	4.13	99.4	2.59	1.92	4.6	93	2.56	2.1	890.6	37	51.9	2514	89	11.7	9.1	52.4	0.3
		SpNS #6	66.9	38.7	28.2	144.8	4.05	101.3	2.61	2.14	4.5	114	3.03	1.7	2598.3	27	67.2	811	97	12.1	7.8	26.3	0.4
		MEAN	68.6167	36.7833	31.8333	143.583	4.36167	99.9167	2.59333	2.14333	4.61667	95.8333	2.38667	2.35	1722.15	30.5	65.6167	1668.17	89.3333	14.4333	10.35	44.4833	0.301667
		SEM	1.48018	0.7534	1.69562	0.932172	0.211131	0.409403	0.0172562	0.0967356	0.149257	5.32552	0.233676	0.277789	532.632	3.37392	3.5715	417.551	3.27278	1.02686	1.51102	5.26925	0.0339035
		Sham #1	-	-	-	-	-	-	-	-	-	-	-	-	-	-	-	-	-	-	-	-	-
		Sham #2	65.6	38.7	26.9	143.1	3.83	97.9	2.52	2.34	4.1	128	2.66	2.3	908.3	29	63.7	1736	79	10.2	9.7	43.2	0.37
		Sham #3	62.8	39.6	23.2	146.2	4.11	101.3	2.53	2.14	4.6	114	2.66	2.3	794.3	41	56.6	654	109	11.1	9.9	31.4	0.31
		Sham #4	66.8	37.8	29	140.9	4.1	100.8	2.57	1.8	4.4	111	2.72	1.9	857.4	24	73.7	728	87	13.1	7	34.4	0.44
		Sham #5	70.8	39.1	31.7	143.9	4.22	101.2	2.68	1.86	4.2	106	2.72	2	4111.2	28	60.4	1780	93	21.7	6	35.4	0.61
		Sham #6	69.5	36.1	33.4	143.7	4.28	100.2	2.62	2.02	4.6	91	1.96	1.3	3063.1	25	53.2	1297	82	15.2	8.3	38.8	0.38
		MEAN	67.1	38.26	28.84	143.56	4.108	100.28	2.584	2.032	4.38	110	2.544	1.96	1946.86	29.4	61.52	1239	90	14.26	8.18	36.64	0.422
		SEM	1.41915	0.615305	1.79683	0.848292	0.0772917	0.62562	0.0297658	0.0974885	0.10198	5.99166	0.146615	0.183303	690.083	3.04302	3.51986	239.416	5.31037	2.05002	0.75591	2.02129	0.0513225
	7	SpNS #1	72.4	37	35.4	143.3	5.25	99.7	2.5	2.16	5	79	1.9	3.6	1713.8	19	78.6	1588	86	29.7	13.4	42.3	0.27
		SpNS #2	67.6	34.9	32.7	141.7	4.54	98.6	2.43	2.18	3.8	102	2.06	2.8	775.9	25	68.9	1272	97	19.5	8.9	32.9	0.28
		SpNS #3	65.9	34.7	31.2	142.9	4.8	99.7	2.52	2.31	4.7	98	2.11	2.7	483.3	21	56.6	1168	94	14.7	10.4	51.1	0.18
		SpNS #4	65.3	39.9	25.4	140.1	4.99	100.1	2.53	2.23	4.5	112	2.79	2.9	4128.7	18	74.4	1950	93	13.3	9.5	40.4	0.26
		SpNS #5	64	38.1	25.9	142.7	4.6	99.3	2.57	2.04	4.7	97	2.74	2.6	905.5	25	53.3	1145	92	11.4	10.1	45.2	0.18
		SpNS #6	64.9	40.4	24.5	143.5	5.25	101.5	2.57	2.63	4.6	122	2.91	3.1	2529	36	74.4	1320	110	16.3	11.9	42	0.15
		MEAN	66.6833	37.5	29.1833	142.367	4.905	99.8167	2.52	2.25833	4.55	101.667	2.41833	2.95	1756.03	24	67.7	1407.17	95.3333	17.4833	10.7	42.3167	0.22
		SEM	1.24403	0.989613	1.84489	0.520683	0.126827	0.39532	0.0212916	0.0826808	0.164823	5.9703	0.180322	0.147761	563.7	2.68328	4.245	126.382	3.28295	2.68929	0.679706	2.43522	0.0229492
		Sham #1	67.1	34.1	33	144.1	5.09	99	2.31	2.58	4.3	98	2.24	4.8	3636.4	77	85.8	1560	126	83.3	21.3	45.9	0.45
		Sham #2	62.9	40.1	22.8	141.7	4.76	98.8	2.52	2.32	4.3	134	2.83	2.6	918.5	20	61.4	2523	85	13.3	9.9	40.4	0.32
		Sham #3	62.7	42.2	20.5	144.3	4.89	102	2.51	2.27	4.5	123	2.75	2.6	789.8	20	61.4	1124	126	14.9	11	23.7	0.37
		Sham #4	64.7	38.6	26.1	140.4	5.02	101.3	2.57	2.1	4.2	116	2.97	2.5	908.4	42	78.2	1124	91	19.2	10.1	55.5	0.18
		Sham #5	68.1	39.2	28.9	142.5	4.94	99.9	2.64	2	3.9	114	2.87	2.5	3670.8	29	61.3	909	91	11.7	8.8	47.9	0.21
		Sham #6	67	37	30	143	5.73	102.4	2.46	2.28	4.6	94	2.25	3.8	3141.2	18	65.4	1622	99	24	13.8	61.2	0.25
		MEAN	65.1	38.84	26.26	142.6	4.94	100.2	2.51	2.254	4.24	117	2.732	3	1984.78	37.6	69.62	1448	103.8	28.48	12.22	42.68	0.306
		SEM	0.994987	1.21676	2.01631	0.67082	0.051559	0.575181	0.0502494	0.091086	0.0894427	5.38516	0.116847	0.411299	622.295	9.71511	4.7424	263.679	8.33367	12.5628	2.0967	4.8623	0.0456983
